# Supplementary material for: Post-Migration Stressors and Health-Related Quality of Life in Refugees from Syria Resettled in Sweden
Source: MDPI journal article supplement (doi:10.3390/ijerph19052509), 2022-02-22

**Figure S1.** Distribution individual items post-migrations stressors  
 1=Never 2=Seldom 3=Sometimes 4=Often 5=Very often

3 questions comprising *financial strain*

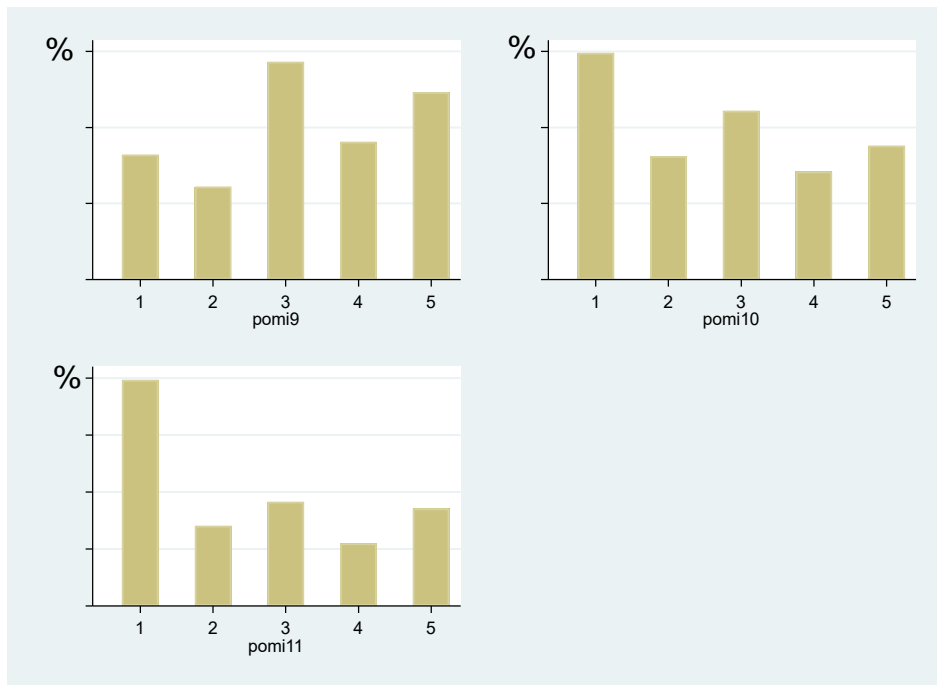

3 questions comprising *social strain*

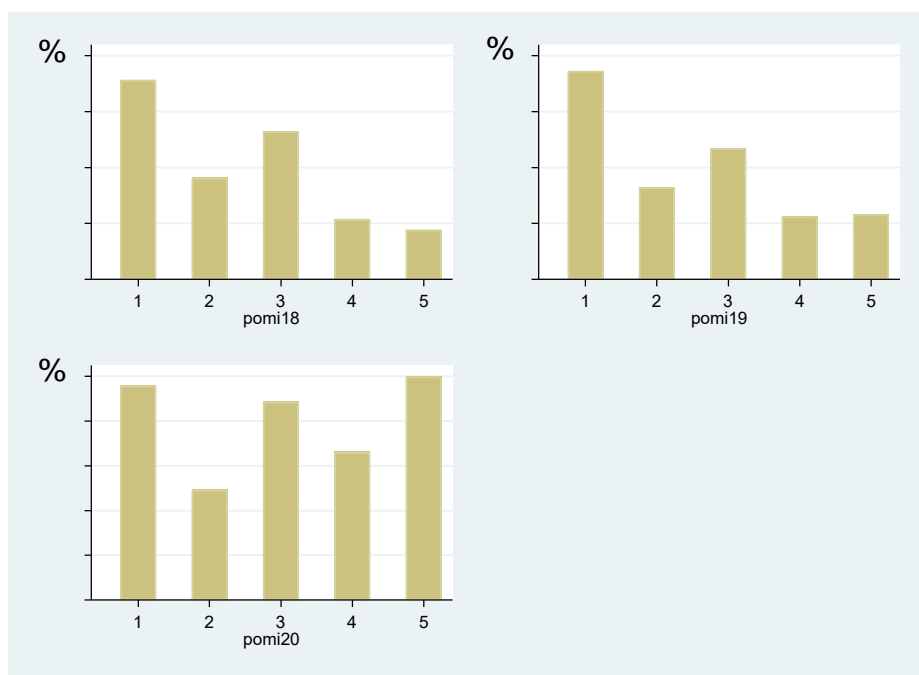

3 questions comprising *host-country competency*

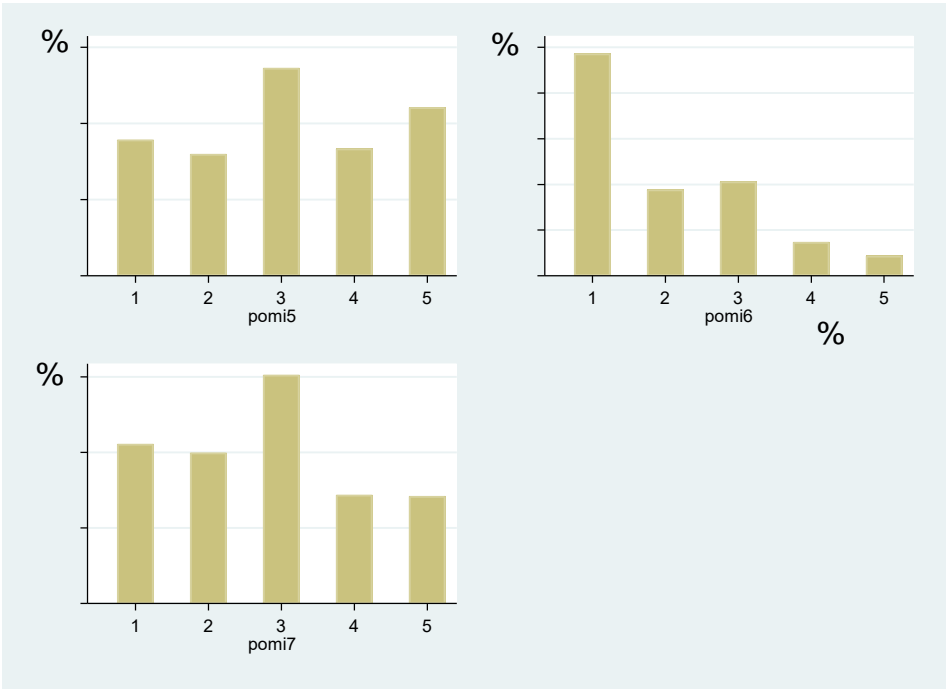

4 questions comprising *discrimination*

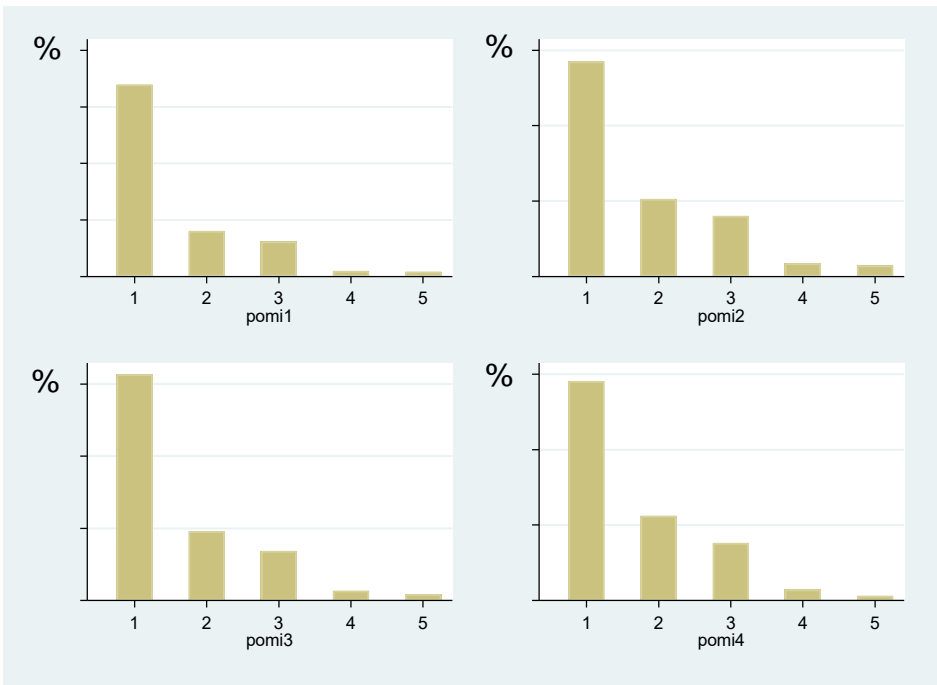

Supplement: s1 [file s1]
